# Supplementary material for: A High Temporal-Spatial Resolution Temperature Sensor for Simultaneous Measurement of Anisotropic Heat Flow
Source: MDPI journal article supplement (doi:10.3390/ma15155385), 2022-08-05
Supplement: s1 [file s1]

## Supplementary Material

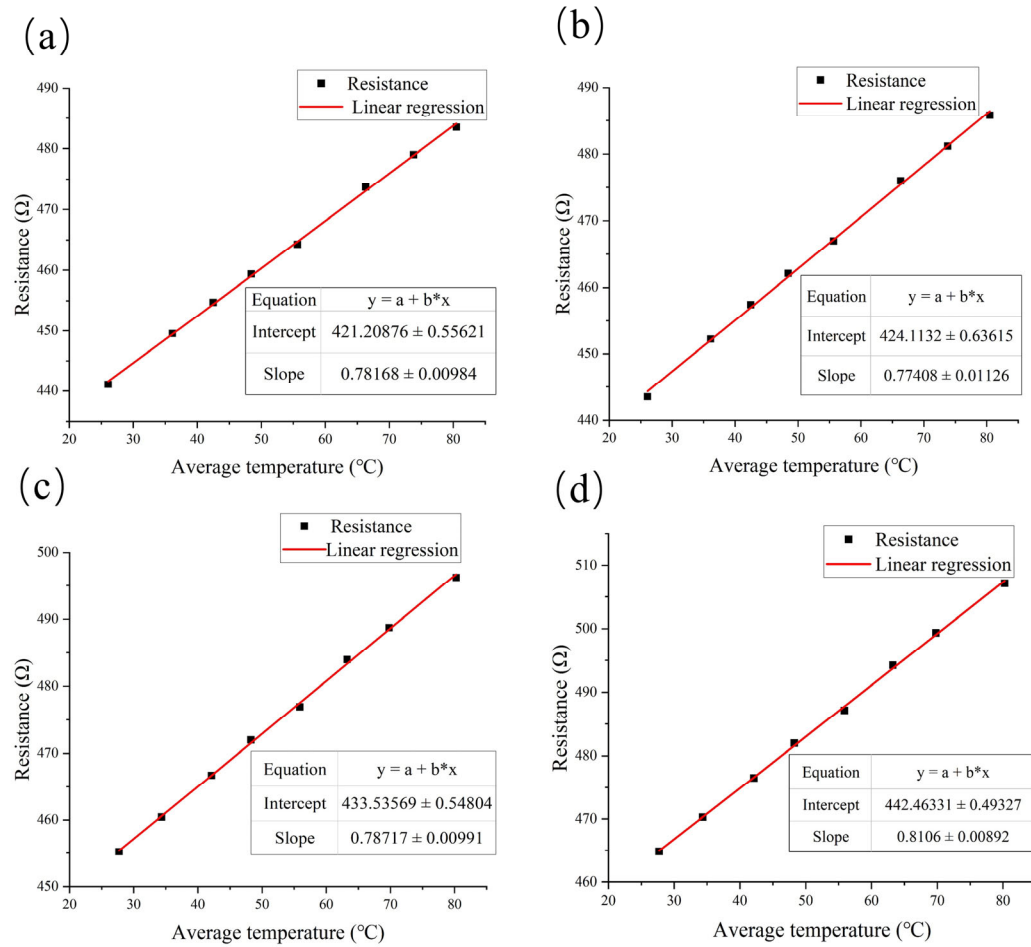

**Figure S1.** Resistance–temperature distribution and linear fitting of four samples. (a–d) represent the fitted resistance–temperature curves of four samples processed from the same batch, respectively

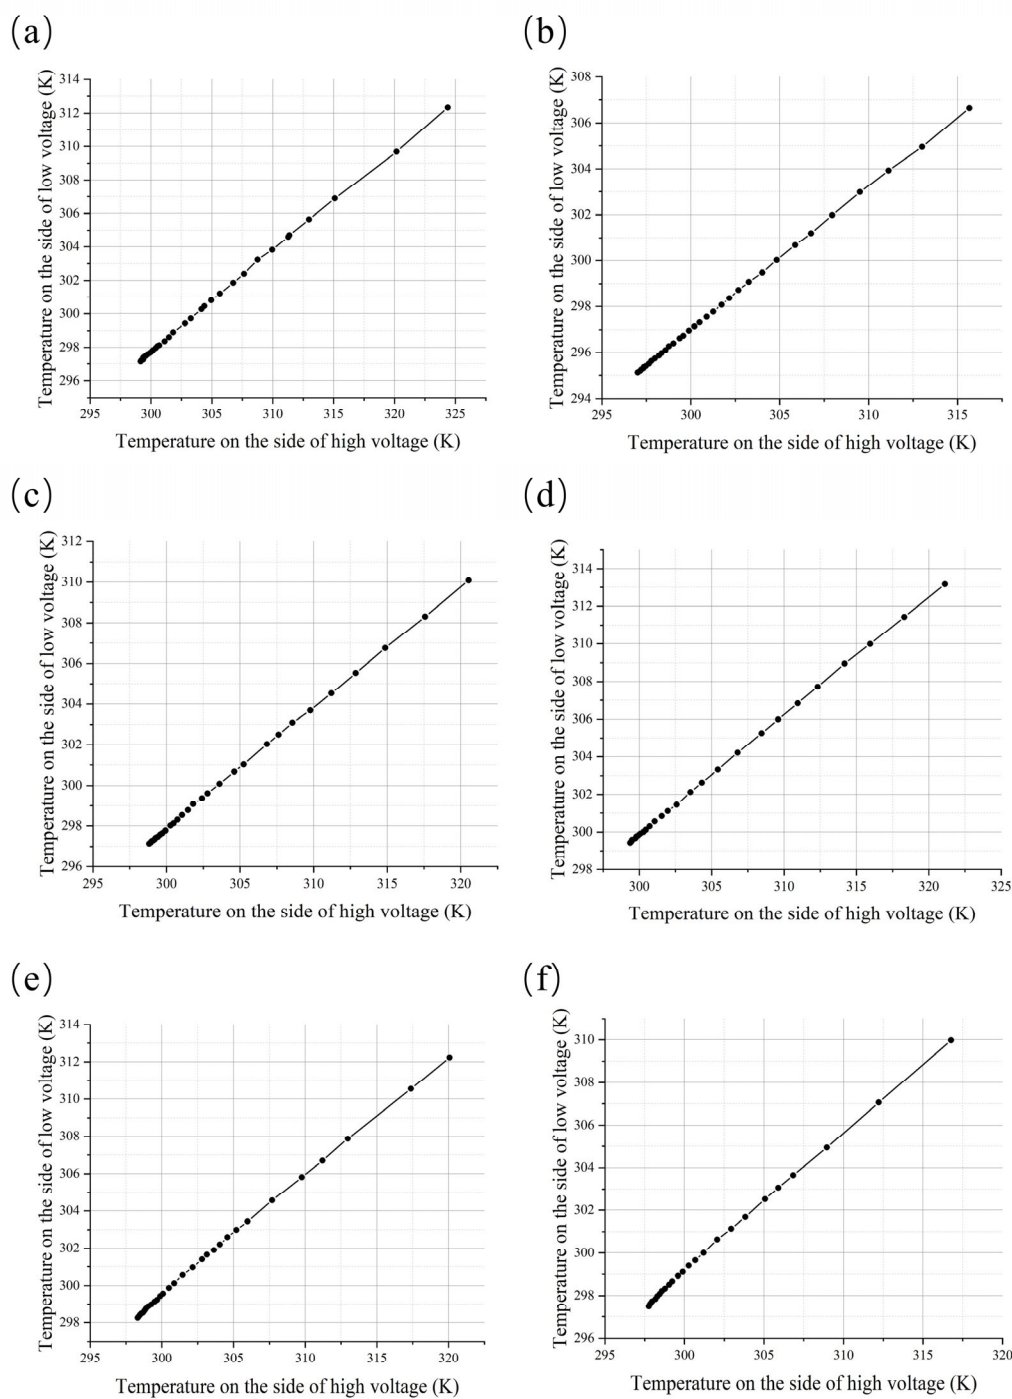

**Figure S2.** (a–c) Three repeated experiments of the first group of sensing unit; (d–f) the third repeated experiment of the second group of sensing unit.

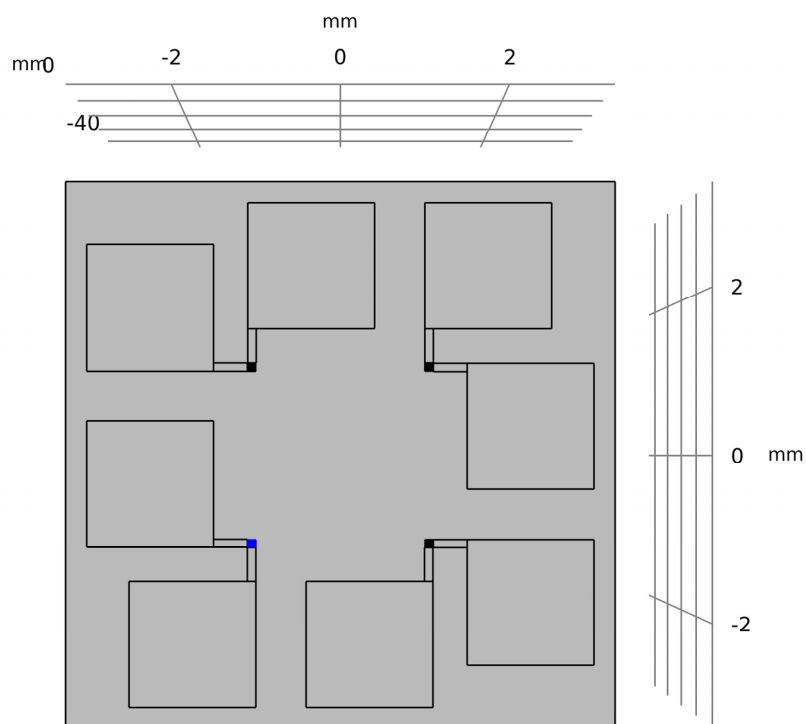

**Figure S3.** Diagram of deposited Pt film sensing units.

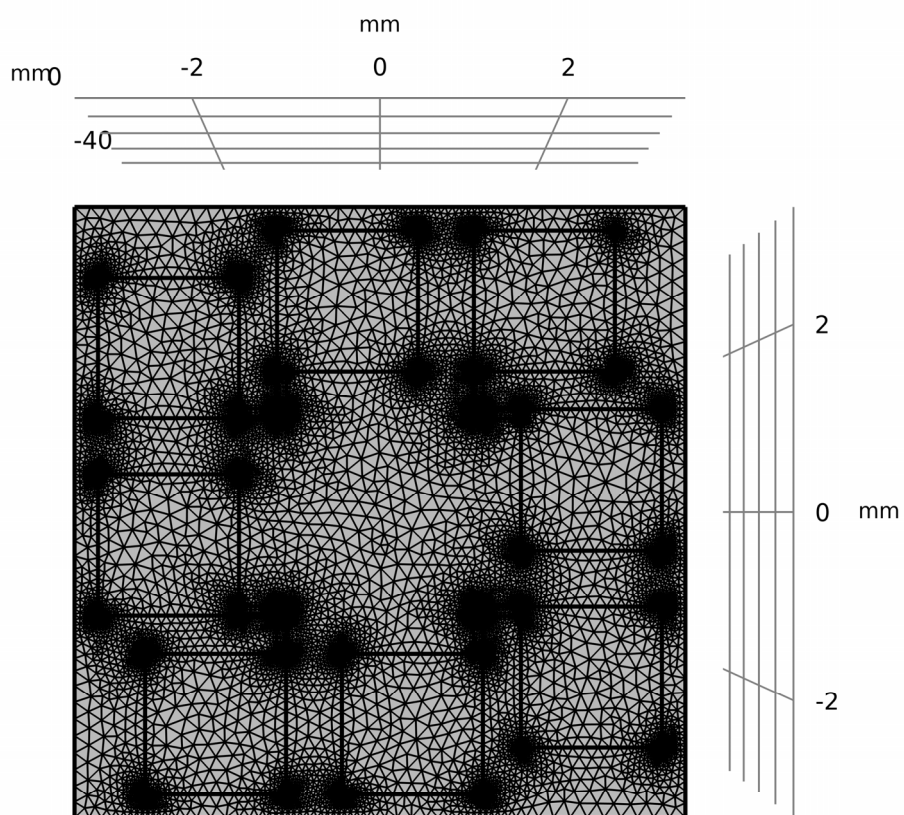

**Figure S4.** Grids built for finite-element thermal simulation.

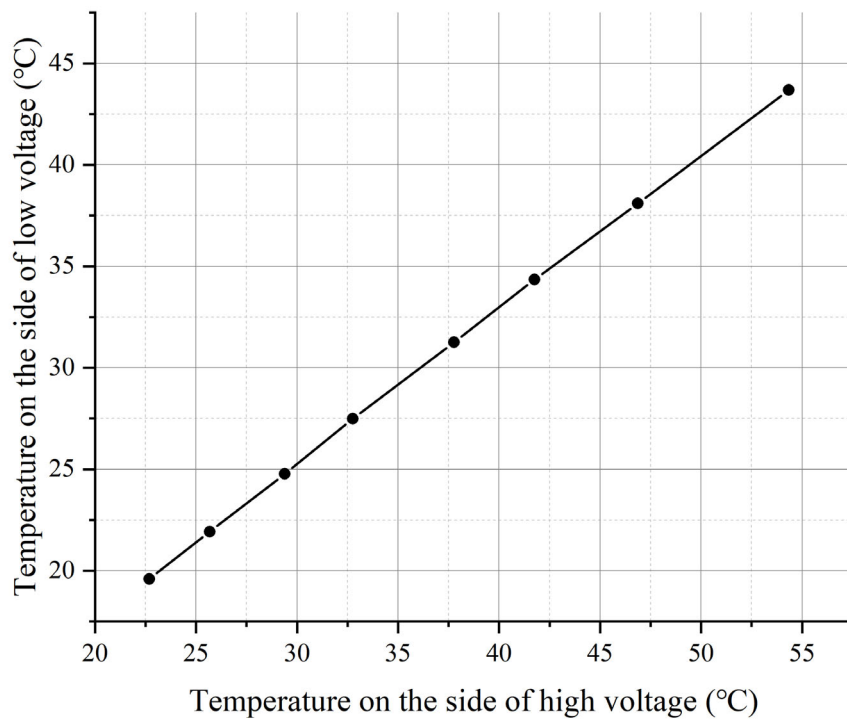

**Figure S5.** The first group of out-of-plane thermal measurement.

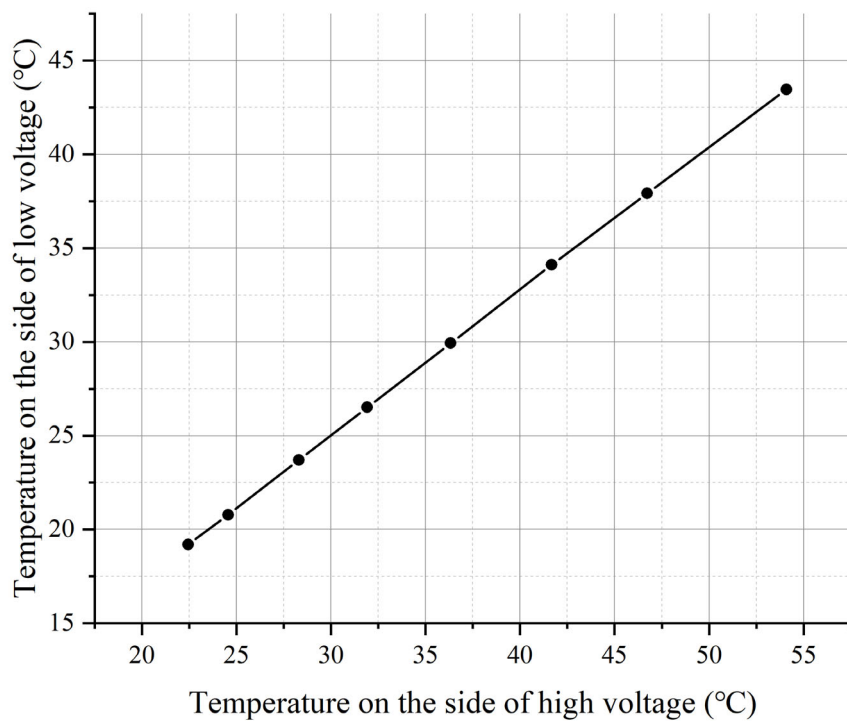

**Figure S6.** The second group of out-of-plane thermal measurement.

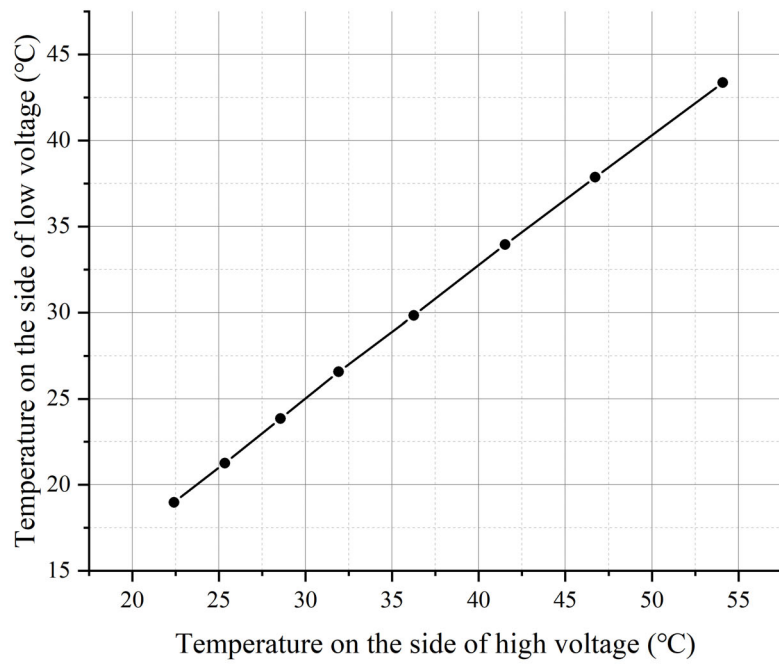

**Figure S7.** The third group of out-of-plane thermal measurement.

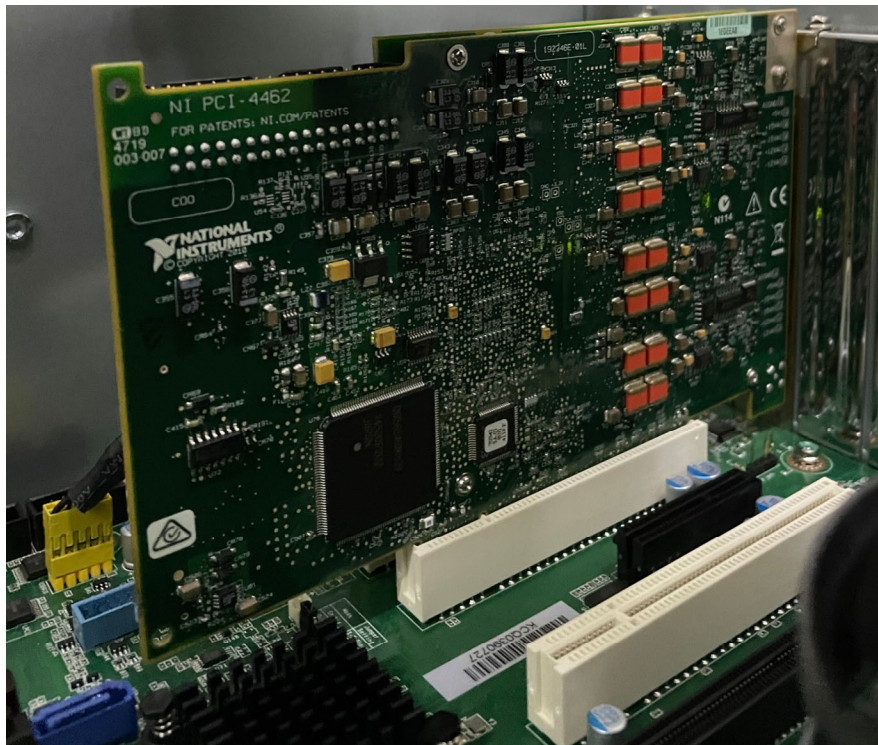

**Figure S8.** Internal chart of the data acquisition card from NI company.



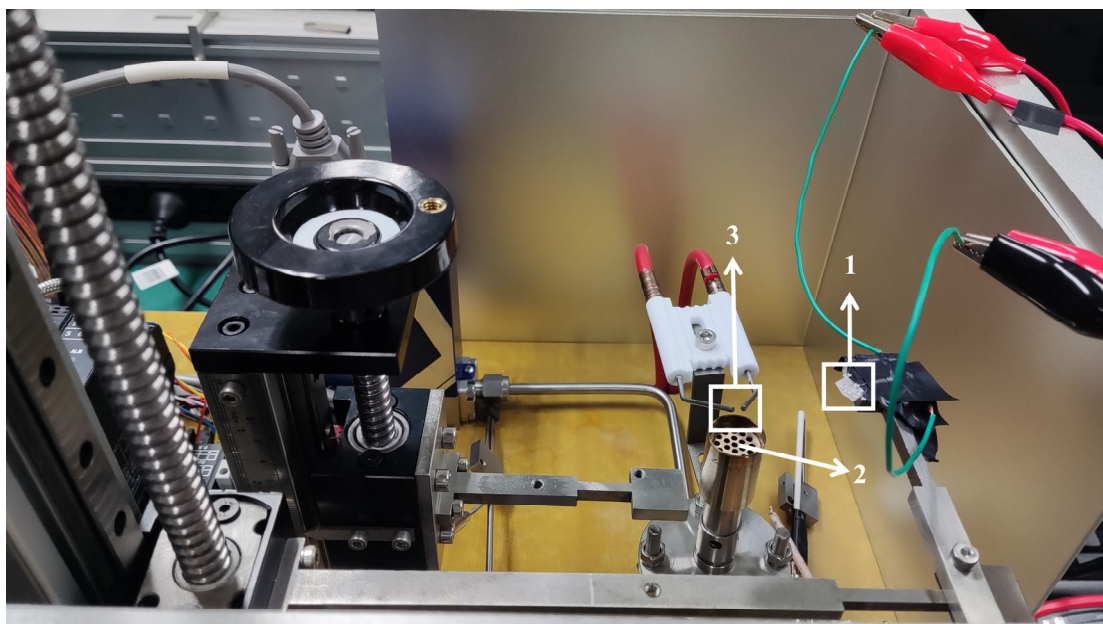

**Figure S9.** The closed look of the testing platform (1, sensor; 2, flame exit; 3, ignition place).

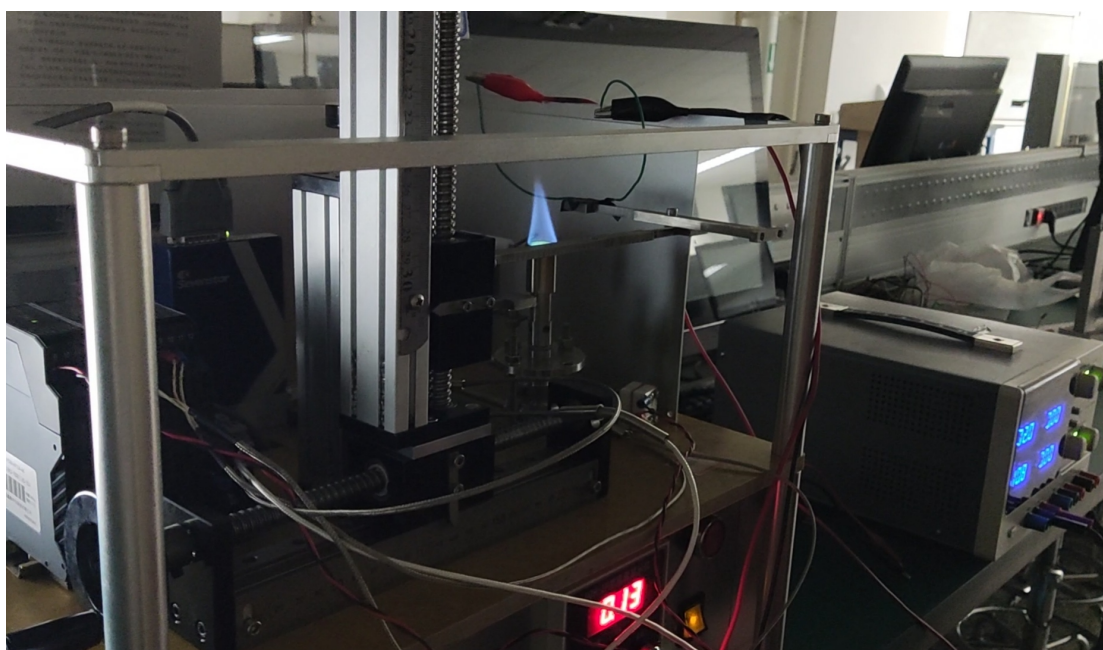

**Figure S10.** Experimental photo of acetylene flame.

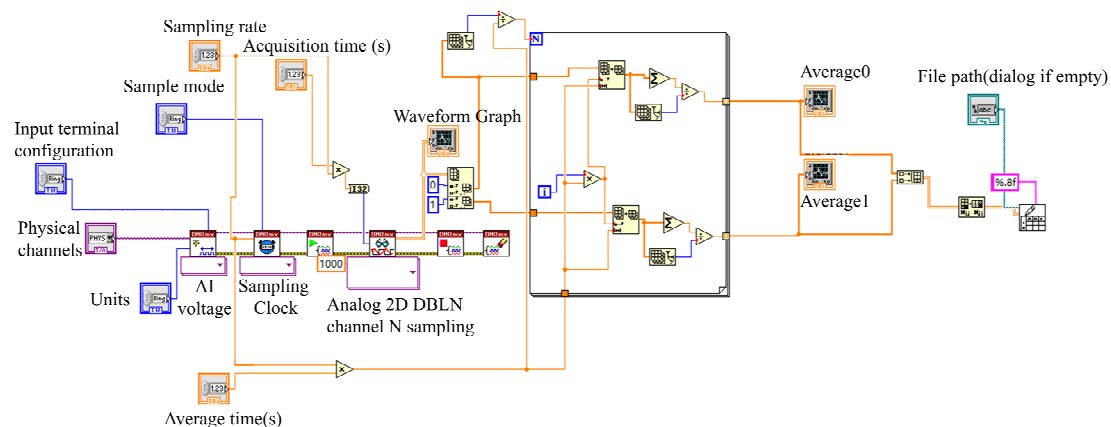

**Figure S11.** Labview data acquisition software block diagram.

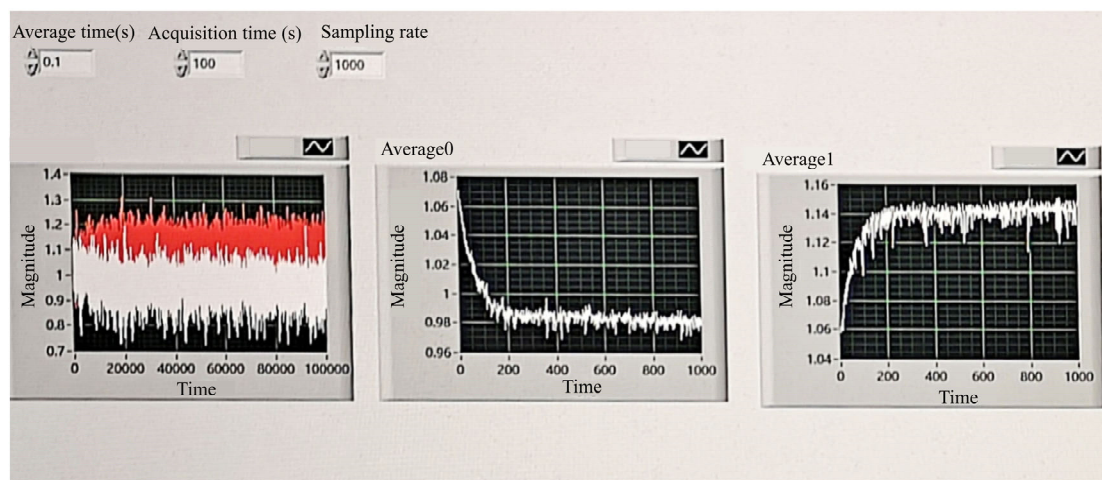

**Figure S12.** Measured temperature change curve of Pt sensor.

**Table S1.** Simulation temperature results of large voltage side.

| Thermal conductivity<br>of platinum<br>/ $\text{Wm}^{-1}\text{K}^{-1}$ | 23       | 24       | 25       | 26       | 27       | 28       |
|------------------------------------------------------------------------|----------|----------|----------|----------|----------|----------|
| Thermal<br>conductivity<br>of AlN/ $\text{Wm}^{-1}\text{K}^{-1}$       |          |          |          |          |          |          |
| 227                                                                    | 320.1443 | 320.1415 | 320.1382 | 320.1352 | 320.1328 | 320.1301 |
| 228                                                                    | 320.1211 | 320.1174 | 320.1149 | 320.1113 | 320.1073 | 320.1072 |
| 229                                                                    | 320.0974 | 320.0946 | 320.0914 | 320.0888 | 320.0866 | 320.0823 |
| 230                                                                    | 320.0737 | 320.0693 | 320.0681 | 320.0651 | 320.0619 | 320.0604 |
| 231                                                                    | 320.0516 | 320.0479 | 320.0452 | 320.0418 | 320.0406 | 320.0370 |
| 232                                                                    | 320.0267 | 320.0251 | 320.0223 | 320.0189 | 320.0170 | 320.0142 |
| 233                                                                    | 320.0053 | 320.0025 | 319.9997 | 319.9955 | 319.9938 | 319.9910 |

**Table S2.** Simulation temperature results of small voltage side.

| Thermal conductivity<br>of AlN/Wm <sup>-1</sup> K <sup>-1</sup><br>Thermal conductivity<br>of platinum<br>/Wm <sup>-1</sup> K <sup>-1</sup> | 23       | 24       | 25       | 26       | 27       | 28       |
|---------------------------------------------------------------------------------------------------------------------------------------------|----------|----------|----------|----------|----------|----------|
| 227                                                                                                                                         | 312.2330 | 312.2329 | 312.2314 | 312.2305 | 312.2301 | 312.2292 |
| 228                                                                                                                                         | 312.2333 | 312.2318 | 312.2315 | 312.2300 | 312.2277 | 312.2295 |
| 229                                                                                                                                         | 312.2325 | 312.2324 | 312.2308 | 312.2305 | 312.2301 | 312.2278 |
| 230                                                                                                                                         | 312.2316 | 312.2296 | 312.2307 | 312.2298 | 312.2285 | 312.2291 |
| 231                                                                                                                                         | 312.2326 | 312.2310 | 312.2300 | 312.2293 | 312.2295 | 312.2281 |
| 232                                                                                                                                         | 312.2299 | 312.2308 | 312.2301 | 312.2285 | 312.2288 | 312.2279 |
| 233                                                                                                                                         | 312.2309 | 312.2305 | 312.2299 | 312.2279 | 312.2279 | 312.2268 |

**Table S3.** Error analysis of simulation temperature results.

| Thermal conductivity<br>of AlN/Wm <sup>-1</sup> K <sup>-1</sup><br>Thermal conductivity<br>of platinum<br>/Wm <sup>-1</sup> K <sup>-1</sup> | 23        | 24        | 25        | 26        | 27        | 28        |
|---------------------------------------------------------------------------------------------------------------------------------------------|-----------|-----------|-----------|-----------|-----------|-----------|
| 227                                                                                                                                         | 1.717E-05 | 1.596E-05 | 1.453E-05 | 1.336E-05 | 1.246E-05 | 1.146E-05 |
| 228                                                                                                                                         | 8.680E-06 | 7.504E-06 | 6.803E-06 | 5.811E-06 | 4.838E-06 | 4.810E-06 |
| 229                                                                                                                                         | 2.948E-06 | 2.467E-06 | 1.916E-06 | 1.546E-06 | 1.277E-06 | 8.175E-07 |
| 230                                                                                                                                         | 2.625E-07 | 5.283E-08 | 5.369E-08 | 7.029E-09 | 2.697E-08 | 5.917E-08 |
| 231                                                                                                                                         | 5.955E-07 | 8.326E-07 | 1.076E-06 | 1.457E-06 | 1.626E-06 | 2.124E-06 |
| 232                                                                                                                                         | 3.985E-06 | 4.347E-06 | 4.959E-06 | 5.773E-06 | 6.254E-06 | 6.995E-06 |
| 233                                                                                                                                         | 9.686E-06 | 1.061E-05 | 1.156E-05 | 1.310E-05 | 1.373E-05 | 1.489E-05 |

**Table S4.** Comparison of simulation experiments.

| Experimental<br>power 1/W | Experimental<br>power 2/W | Experimental<br>temperature 1/K | Simulation<br>temperature 1/K | Experimental<br>temperature 2/K | Simulation<br>temperature 2/K |
|---------------------------|---------------------------|---------------------------------|-------------------------------|---------------------------------|-------------------------------|
| 0.2108                    | 0.003297                  | 320.07                          | 320.07                        | 312.23                          | 312.23                        |
| 0.1853                    | 0.003289                  | 317.37                          | 317.78                        | 310.55                          | 310.89                        |



In Table S5, Table S6, and Table S7,  $V_1$ ,  $V_2$ ,  $R$ , and  $T$  refer to the voltage representation of the 500  $\Omega$  resistance to be measured in the measurement circuit on the large voltage side, the voltage representation of the temperature measurement unit, the calculated resistance value of the temperature measurement unit, and the temperature value corresponding to the temperature measurement unit it represents, respectively;  $V_1'$ ,  $V_2'$ ,  $R'$ , and  $T'$  refer to the corresponding values in the measurement circuit on the small voltage side, respectively.

**Table S5.** The first group of out-of-plane thermal measurement.

| $V_1/\text{mv}$<br>(500 $\Omega$ ) | $V_2/\text{mv}$ | $R/\Omega$ | $T/^\circ\text{C}$ | $V_1'/\text{mv}$<br>(500 $\Omega$ ) | $V_2'/\text{mv}$ | $R'/\Omega$ | $T'/^\circ\text{C}$ |
|------------------------------------|-----------------|------------|--------------------|-------------------------------------|------------------|-------------|---------------------|
| 2317                               | 1839            | 396.8      | 22.69              | 1495                                | 1199             | 400.9       | 19.60               |
| 4094                               | 3266            | 398.9      | 25.67              | 1493                                | 1202             | 402.5       | 21.92               |
| 5496                               | 4413            | 401.4      | 29.40              | 1489                                | 1205             | 404.5       | 24.77               |
| 6630                               | 5354            | 403.8      | 32.76              | 1487                                | 1208             | 406.4       | 27.48               |
| 7934                               | 6462            | 407.2      | 37.77              | 1482                                | 1213             | 409.1       | 31.25               |
| 8794                               | 7211            | 410.0      | 41.76              | 1478                                | 1216             | 411.3       | 34.35               |
| 9859                               | 8154            | 413.5      | 46.87              | 1474                                | 1220             | 413.9       | 38.09               |
| 11204                              | 9382            | 418.7      | 54.33              | 1468                                | 1227             | 417.8       | 43.68               |

**Table S6.** The second group of out-of-plane thermal measurement.

| $V_1/\text{mv}$<br>(500 $\Omega$ ) | $V_2/\text{mv}$ | $R/\Omega$ | $T/^\circ\text{C}$ | $V_1'/\text{mv}$<br>(500 $\Omega$ ) | $V_2'/\text{mv}$ | $R'/\Omega$ | $T'/^\circ\text{C}$ |
|------------------------------------|-----------------|------------|--------------------|-------------------------------------|------------------|-------------|---------------------|
| 2284                               | 1812            | 396.6      | 22.44              | 1495                                | 1198             | 400.6       | 19.19               |
| 3550                               | 2826            | 398.1      | 24.56              | 1493                                | 1200             | 401.7       | 20.78               |
| 5144                               | 4122            | 400.7      | 28.30              | 1490                                | 1203             | 403.8       | 23.71               |
| 6368                               | 5135            | 403.2      | 31.92              | 1487                                | 1207             | 405.7       | 26.51               |
| 7562                               | 6144            | 406.2      | 36.33              | 1483                                | 1211             | 408.2       | 29.93               |
| 8794                               | 7210            | 409.9      | 41.68              | 1478                                | 1215             | 411.1       | 34.12               |
| 9859                               | 8152            | 413.4      | 46.73              | 1474                                | 1220             | 413.8       | 37.91               |
| 11205                              | 9379            | 418.5      | 54.09              | 1468                                | 1226             | 417.6       | 43.45               |

**Table S7.** The third group of out-of-plane thermal measurement.

| $V_1/\text{mv}$<br>(500 $\Omega$ ) | $V_2/\text{mv}$ | $R/\Omega$ | $T/^\circ\text{C}$ | $V_1'/\text{mv}$<br>(500 $\Omega$ ) | $V_2'/\text{mv}$ | $R'/\Omega$ | $T'/^\circ\text{C}$ |
|------------------------------------|-----------------|------------|--------------------|-------------------------------------|------------------|-------------|---------------------|
| 2284                               | 1811            | 396.6      | 22.40              | 1495                                | 1198             | 400.5       | 18.98               |
| 3992                               | 3183            | 398.6      | 25.35              | 1493                                | 1200             | 402.1       | 21.26               |
| 5315                               | 4261            | 400.9      | 28.56              | 1490                                | 1203             | 403.9       | 23.85               |
| 6368                               | 5135            | 403.2      | 31.92              | 1487                                | 1207             | 405.8       | 26.58               |
| 7563                               | 6144            | 406.2      | 36.25              | 1483                                | 1210             | 408.1       | 29.84               |
| 8795                               | 7209            | 409.8      | 41.53              | 1478                                | 1215             | 411.0       | 33.95               |
| 9859                               | 8152            | 413.4      | 46.73              | 1474                                | 1220             | 413.7       | 37.87               |
| 11206                              | 9380            | 418.5      | 54.10              | 1468                                | 1226             | 417.6       | 43.37               |
